# Supplementary material
Source: HighWire-hosted journal article supplement (https://www.rcpjournals.org/highwire/filestream/12768/field_highwire_adjunct_files/6/S4._Reported_MRC_dyspnoea_scores_for_breathlessness_on_exertion_before_and_after_COVID_pneumonia..pdf)
Supplement: S4._Reported_MRC_dyspnoea_scores_for_breathlessness_on_exertion_before_and_after_COVID_pneumonia..pdf [file S4._Reported_MRC_dyspnoea_scores_for_breathlessness_on_exertion_before_and_after_COVID_pneumonia..pdf]

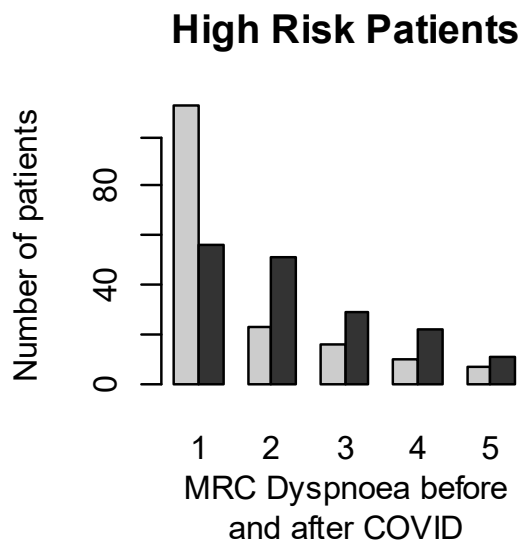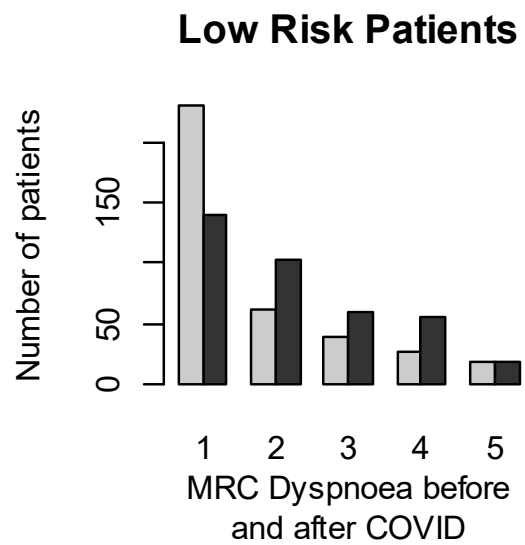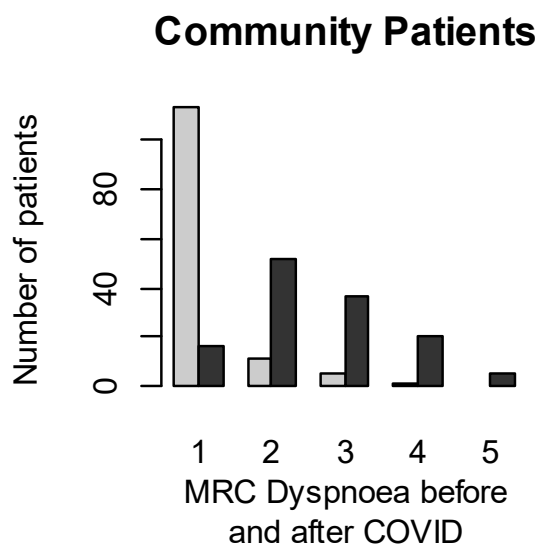

Before  
After

**S4. Reported MRC Dyspnoea scores for breathlessness on exertion before (grey) and after (black) COVID pneumonia.**
